# Supplementary material
Source: PubMed Central journal article supplement (PMC6600934)
Supplement: pnas.1902844116.sapp.pdf [file pnas.1902844116.sapp.pdf]

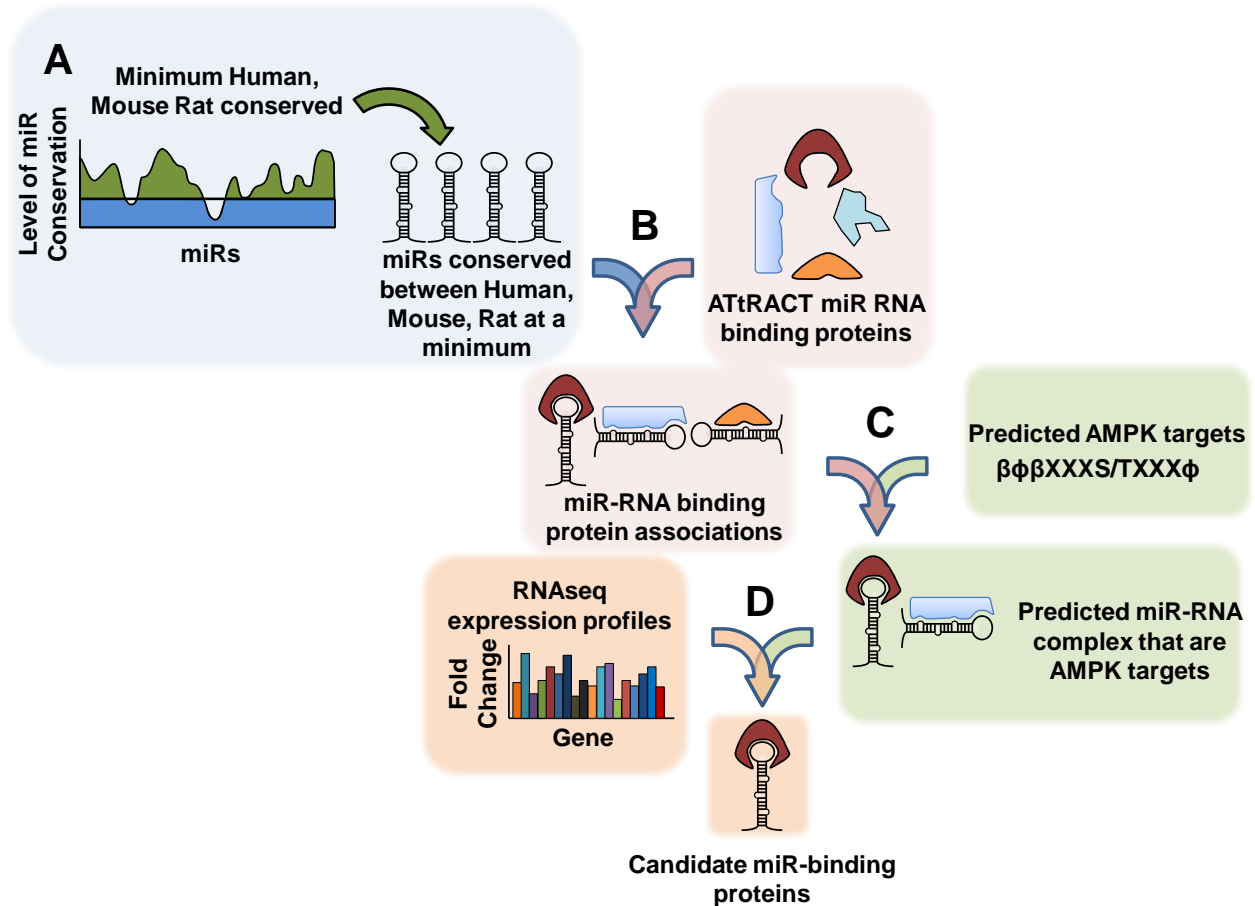

**Figure S1. The stepwise bioinformatics approach for the identification of miR binding proteins.** (A) Initially, miR sequences from miRbase (x-axis) were filtered based on their conservation among 13 different species with those conserved at least between human, mouse, and rat colored in green (y-axis); (B) RNA binding sequences specific to RNA binding proteins (represented as colored shapes) from the A daTabase of RNA binding proteins and AssoCiated moTifs (ATtRACT) were matched to miRs from miRbase database; (C) RNA binding proteins containing the putative AMPK phosphorylation sequence (14,15) were identified; and (D) PS/OS RNAseq data (18) was lastly used to verify the expression level of the AMPK-targeted miR-binding proteins.

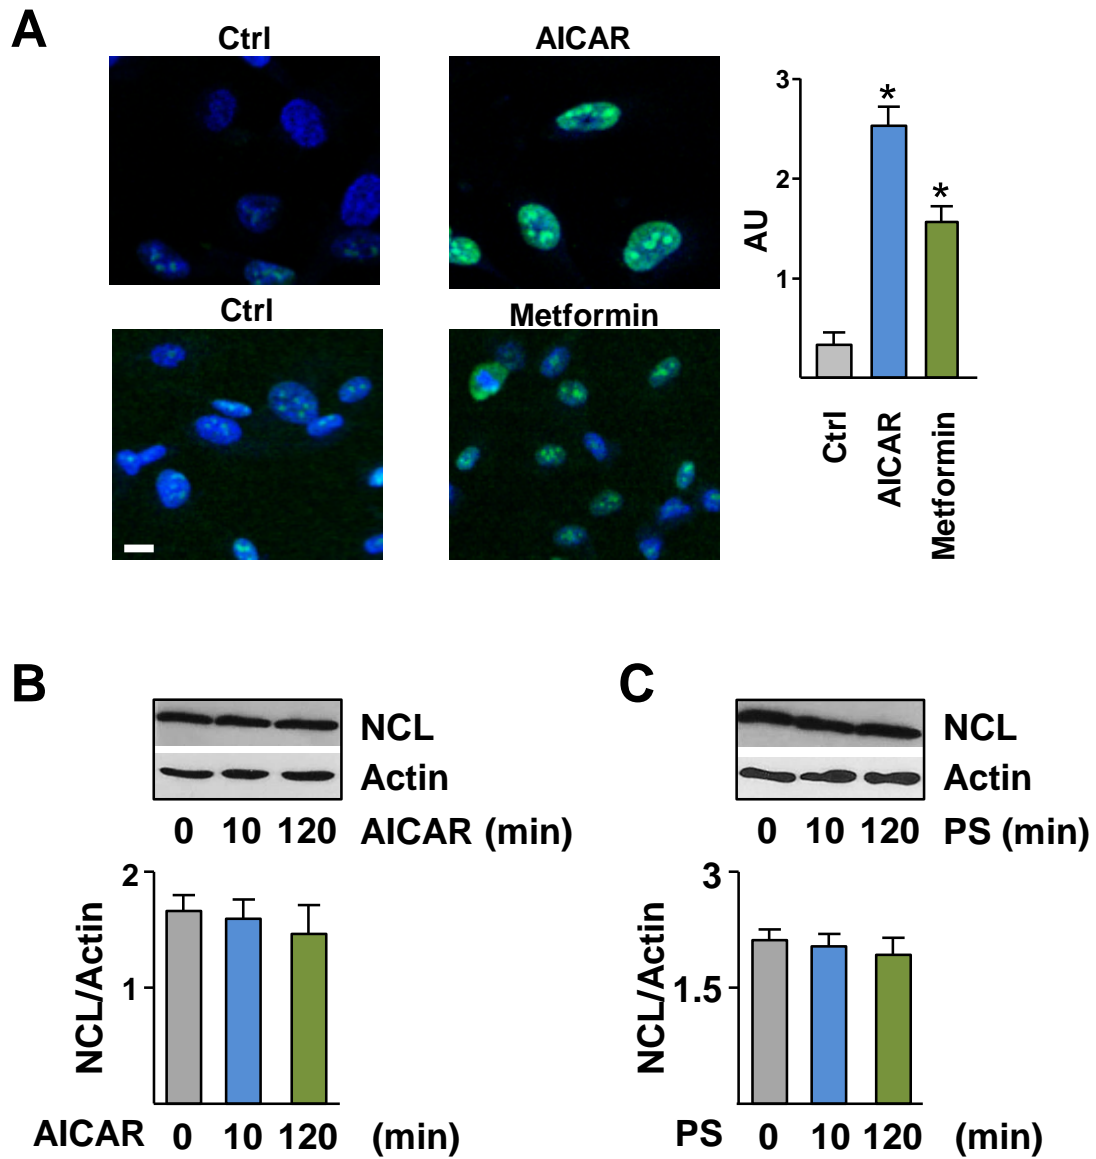

**Figure S2. NCL protein level was not changed by AICAR or PS:** (A) NCL immunofluorescence (green) and DAPI (blue) staining for HUVECs treated with AICAR (1 mM) or metformin (1 mM) for 10 min. Scale bar indicates 20  $\mu$ m. (B-C) HUVECs were treated with AICAR (B) or subjected to PS (C) with indicated times. Immunoblotting of cell lysates was performed to detect the expression level of NCL. Data are mean  $\pm$  SEM. n = 3. .

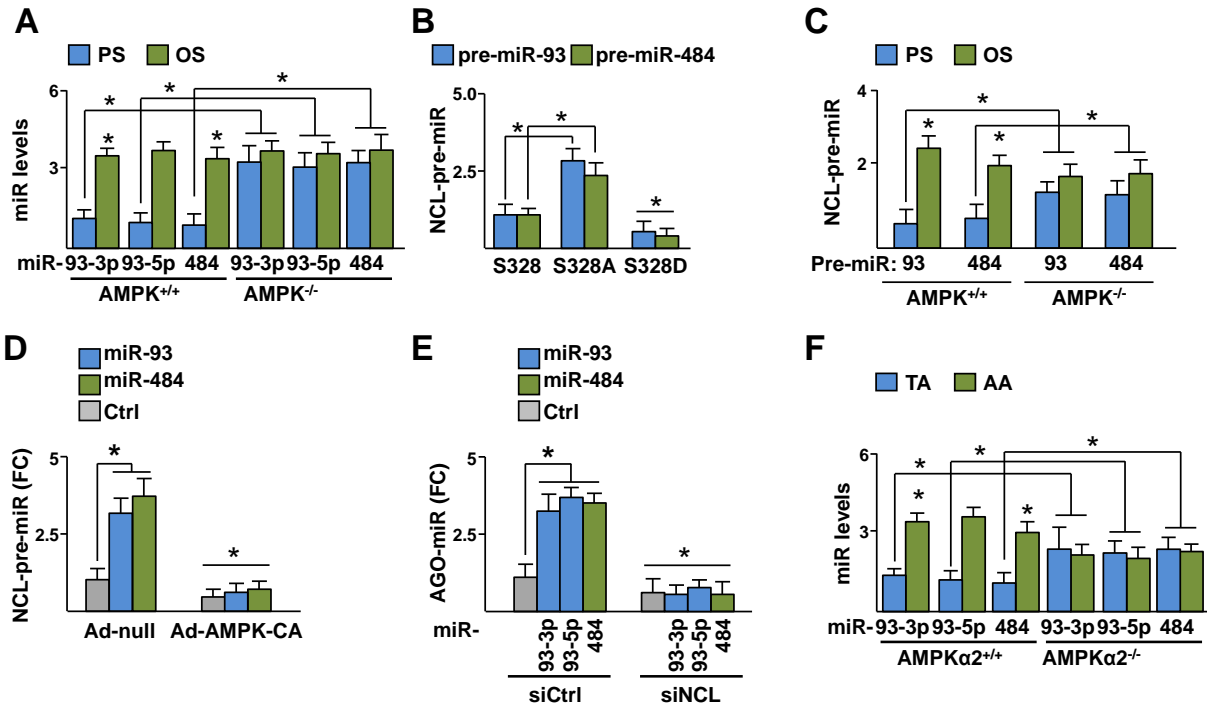

**Figure S3. NCL regulates miR-93 and miR-484:** (A) AMPK<sup>+/+</sup> and AMPK<sup>-/-</sup> MEFs were subjected to PS or OS. The level of miR-93-3p, miR-93-5p, or miR-484 was then measured. (B) NCL S328, S328A, or S328D was transfected into HUVECs. Transfected NCL was immunoprecipitated and the level of pre-miR-93 and pre-miR-484 bound to NCL was measured. (C) AMPK<sup>+/+</sup> and AMPK<sup>-/-</sup> MEFs were subjected to PS or OS. The amount of pre-miR-93 and pre-miR-484 binding to NCL was measured. (D) miR-93 or miR-484 was transfected into HUVECs that were then infected with an adenovirus overexpressing activated AMPK (Ad-AMPK-CA) or an empty vector (Ad-null). NCL was immunoprecipitated and the level of pre-miR-93 and pre-miR-484 binding to NCL was measured. (E) miR-93 or miR-484 was transfected into HUVECs that were then transfected with control or NCL siRNA. AGO2 was immunoprecipitated and the amount of AGO2-associated miR-93-3p, miR-93-5p, or miR-484 binding was determined. (F) The level of miR-93-3p, miR-93-5p, or miR-484 were measured in isolated TA or AA from AMPKα2<sup>+/+</sup> or AMPKα2<sup>-/-</sup> mice. \* indicates p < 0.05. Error bars represent mean ± SEM. n = 3.

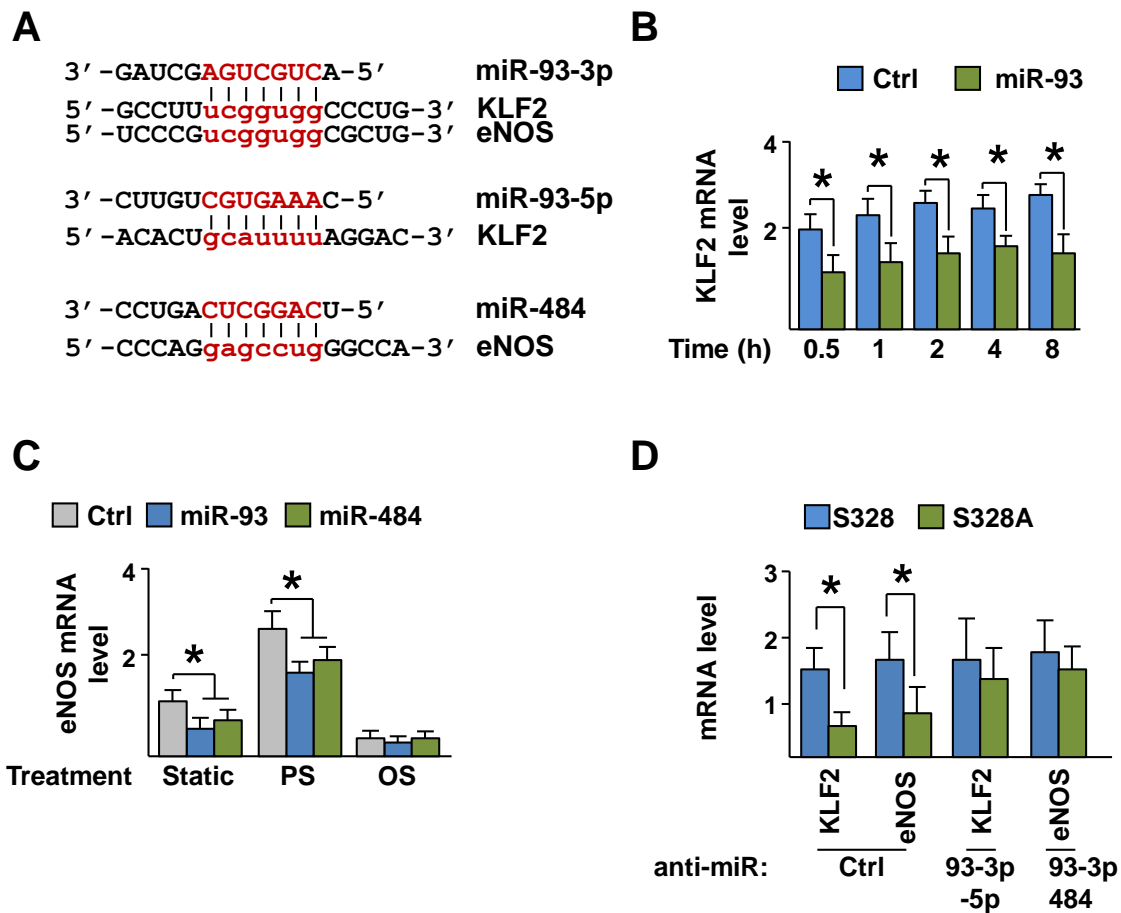

**Figure S4. miR-mRNA complementarity.** (A) Complementarity between miR-93-3p, miR-93-5p, or miR-484 seed sequences and human KLF2 and eNOS mRNA. (B) miR-93, or scrambled control, were transfected into HUVECs that were then subjected to PS. Following treatment, KLF2 mRNA levels were measured. (C) eNOS mRNA levels in HUVECS transfected with plasmids expressing miR-93, miR-484, or scrambled control, and subjected to PS or OS for 24 hours. (D) HUVECs were transfected with NCL S328 or S328A with or without anti-miR-93-3p, anti-miR-93-5p, or anti-miR-484 and subjected to PS. Following shear, mRNA levels were measured. \* indicates  $p < 0.05$ . Error bars represent mean  $\pm$  SEM.  $n = 3$ .

**Table S1: Species conservation of NCL binding site**

| Targeting Factor | Number Species | gene symbol  |
|------------------|----------------|--------------|
| NCL              | 23             | MIR-93       |
| NCL              | 15             | MIR-484      |
| NCL              | 9              | MIR-206      |
| NCL              | 9              | MIR-887      |
| NCL              | 5              | MIR-598      |
| NCL              | 4              | MIR-2118B    |
| NCL              | 4              | MIR-219-1    |
| NCL              | 3              | MIR-219      |
| NCL              | 3              | MIR-219A-1   |
| NCL              | 3              | MIR-326      |
| NCL              | 3              | MIR-395D     |
| NCL              | 2              | MIR-151B     |
| NCL              | 2              | MIR-199B     |
| NCL              | 2              | MIR-2392     |
| NCL              | 2              | MIR-263B     |
| NCL              | 2              | MIR-30A      |
| NCL              | 2              | MIR-482D     |
| NCL              | 2              | MIR-623      |
| NCL              | 2              | MIR-705      |
| NCL              | 2              | MIR-92B      |
| NCL              | 2              | MIR-H3       |
| NCL              | 1              | LET-7A-3     |
| NCL              | 1              | LET-7B       |
| NCL              | 1              | MIR-1001     |
| NCL              | 1              | MIR-10034-1  |
| NCL              | 1              | MIR-10034-2  |
| NCL              | 1              | MIR-10392    |
| NCL              | 1              | MIR-10462-1  |
| NCL              | 1              | MIR-10462-2  |
| NCL              | 1              | MIR-10547A-1 |
| NCL              | 1              | MIR-10547A-2 |
| NCL              | 1              | MIR-10547A-3 |
| NCL              | 1              | MIR-10693    |
| NCL              | 1              | MIR-1071     |
| NCL              | 1              | MIR-10843    |
| NCL              | 1              | MIR-10984A   |
| NCL              | 1              | MIR-10984B   |
| NCL              | 1              | MIR-10991A   |
| NCL              | 1              | MIR-10991B   |
| NCL              | 1              | MIR-10991D   |
| NCL              | 1              | MIR-10991E   |
| NCL              | 1              | MIR-11019    |
| NCL              | 1              | MIR-11058    |
| NCL              | 1              | MIR-11119    |

|     |   |            |
|-----|---|------------|
| NCL | 1 | MIR-11166  |
| NCL | 1 | MIR-11423L |
| NCL | 1 | MIR-11532  |
| NCL | 1 | MIR-11556  |
| NCL | 1 | MIR-12     |
| NCL | 1 | MIR-12055  |
| NCL | 1 | MIR-12164  |
| NCL | 1 | MIR-12295  |
| NCL | 1 | MIR-128-2  |
| NCL | 1 | MIR-1337   |
| NCL | 1 | MIR-135A-2 |
| NCL | 1 | MIR-1379   |
| NCL | 1 | MIR-1421M  |
| NCL | 1 | MIR-1422L  |
| NCL | 1 | MIR-1486   |
| NCL | 1 | MIR-1493-1 |
| NCL | 1 | MIR-1503   |
| NCL | 1 | MIR-1507B  |
| NCL | 1 | MIR-1514A  |
| NCL | 1 | MIR-1515A  |
| NCL | 1 | MIR-1515B  |
| NCL | 1 | MIR-1523A  |
| NCL | 1 | MIR-160B   |
| NCL | 1 | MIR-166H   |
| NCL | 1 | MIR-166L   |
| NCL | 1 | MIR-168    |
| NCL | 1 | MIR-1706   |
| NCL | 1 | MIR-171A   |
| NCL | 1 | MIR-181A   |
| NCL | 1 | MIR-1851   |
| NCL | 1 | MIR-1862A  |
| NCL | 1 | MIR-1868   |
| NCL | 1 | MIR-193    |
| NCL | 1 | MIR-193A   |
| NCL | 1 | MIR-199-3  |
| NCL | 1 | MIR-1B     |
| NCL | 1 | MIR-2058   |
| NCL | 1 | MIR-2071   |
| NCL | 1 | MIR-2071-1 |
| NCL | 1 | MIR-2071-2 |
| NCL | 1 | MIR-210    |
| NCL | 1 | MIR-2118A  |
| NCL | 1 | MIR-2118C  |
| NCL | 1 | MIR-2118N  |
| NCL | 1 | MIR-2118P  |
| NCL | 1 | MIR-2118Q  |
| NCL | 1 | MIR-2120B  |

|     |   |            |
|-----|---|------------|
| NCL | 1 | MIR-219A   |
| NCL | 1 | MIR-2235C  |
| NCL | 1 | MIR-2266   |
| NCL | 1 | MIR-228    |
| NCL | 1 | MIR-2573   |
| NCL | 1 | MIR-2678   |
| NCL | 1 | MIR-26A    |
| NCL | 1 | MIR-26A-2  |
| NCL | 1 | MIR-2731-1 |
| NCL | 1 | MIR-2731-2 |
| NCL | 1 | MIR-283    |
| NCL | 1 | MIR-2867   |
| NCL | 1 | MIR-2869   |
| NCL | 1 | MIR-2944C  |
| NCL | 1 | MIR-296    |
| NCL | 1 | MIR-29B    |
| NCL | 1 | MIR-2F     |
| NCL | 1 | MIR-2H-1   |
| NCL | 1 | MIR-2H-2   |
| NCL | 1 | MIR-305    |
| NCL | 1 | MIR-315    |
| NCL | 1 | MIR-316    |
| NCL | 1 | MIR-3167   |
| NCL | 1 | MIR-3197   |
| NCL | 1 | MIR-319B   |
| NCL | 1 | MIR-320D-2 |
| NCL | 1 | MIR-3244   |
| NCL | 1 | MIR-33     |
| NCL | 1 | MIR-3303   |
| NCL | 1 | MIR-34     |
| NCL | 1 | MIR-3410   |
| NCL | 1 | MIR-3422   |
| NCL | 1 | MIR-3450   |
| NCL | 1 | MIR-3462   |
| NCL | 1 | MIR-3470B  |
| NCL | 1 | MIR-36B    |
| NCL | 1 | MIR-3709A  |
| NCL | 1 | MIR-3709B  |
| NCL | 1 | MIR-3718A  |
| NCL | 1 | MIR-3718C  |
| NCL | 1 | MIR-375    |
| NCL | 1 | MIR-3871   |
| NCL | 1 | MIR-393    |
| NCL | 1 | MIR-393A   |
| NCL | 1 | MIR-393B   |
| NCL | 1 | MIR-396C   |
| NCL | 1 | MIR-396J   |

|     |   |            |
|-----|---|------------|
| NCL | 1 | MIR-396K   |
| NCL | 1 | MIR-396P   |
| NCL | 1 | MIR-396T   |
| NCL | 1 | MIR-397B   |
| NCL | 1 | MIR-403F   |
| NCL | 1 | MIR-4076   |
| NCL | 1 | MIR-4321   |
| NCL | 1 | MIR-4400   |
| NCL | 1 | MIR-4588   |
| NCL | 1 | MIR-46     |
| NCL | 1 | MIR-4622   |
| NCL | 1 | MIR-4624   |
| NCL | 1 | MIR-4674   |
| NCL | 1 | MIR-4710   |
| NCL | 1 | MIR-4829C  |
| NCL | 1 | MIR-4854   |
| NCL | 1 | MIR-496    |
| NCL | 1 | MIR-5      |
| NCL | 1 | MIR-5029   |
| NCL | 1 | MIR-5100   |
| NCL | 1 | MIR-5169B  |
| NCL | 1 | MIR-516A-1 |
| NCL | 1 | MIR-516A-2 |
| NCL | 1 | MIR-5289B  |
| NCL | 1 | MIR-541    |
| NCL | 1 | MIR-54A    |
| NCL | 1 | MIR-5510   |
| NCL | 1 | MIR-5518   |
| NCL | 1 | MIR-5548   |
| NCL | 1 | MIR-5608   |
| NCL | 1 | MIR-5642A  |
| NCL | 1 | MIR-5642B  |
| NCL | 1 | MIR-5671A  |
| NCL | 1 | MIR-5672   |
| NCL | 1 | MIR-5742   |
| NCL | 1 | MIR-6066   |
| NCL | 1 | MIR-611    |
| NCL | 1 | MIR-6219   |
| NCL | 1 | MIR-6225   |
| NCL | 1 | MIR-6238   |
| NCL | 1 | MIR-6280   |
| NCL | 1 | MIR-6596   |
| NCL | 1 | MIR-66     |
| NCL | 1 | MIR-6664   |
| NCL | 1 | MIR-6712   |
| NCL | 1 | MIR-6724-1 |
| NCL | 1 | MIR-6724-2 |



|     |   |              |
|-----|---|--------------|
| NCL | 1 | MIR-6724-3   |
| NCL | 1 | MIR-6724-4   |
| NCL | 1 | MIR-6790     |
| NCL | 1 | MIR-7144     |
| NCL | 1 | MIR-7471     |
| NCL | 1 | MIR-750      |
| NCL | 1 | MIR-7504E    |
| NCL | 1 | MIR-767      |
| NCL | 1 | MIR-7769     |
| NCL | 1 | MIR-7771     |
| NCL | 1 | MIR-7816     |
| NCL | 1 | MIR-786      |
| NCL | 1 | MIR-7911C-1  |
| NCL | 1 | MIR-7911C-2  |
| NCL | 1 | MIR-8032A    |
| NCL | 1 | MIR-8032B    |
| NCL | 1 | MIR-8032C    |
| NCL | 1 | MIR-8032D    |
| NCL | 1 | MIR-8032E    |
| NCL | 1 | MIR-8032F    |
| NCL | 1 | MIR-8032G    |
| NCL | 1 | MIR-8128     |
| NCL | 1 | MIR-8232     |
| NCL | 1 | MIR-828      |
| NCL | 1 | MIR-8348     |
| NCL | 1 | MIR-8448     |
| NCL | 1 | MIR-8473     |
| NCL | 1 | MIR-8521A-1  |
| NCL | 1 | MIR-8521A-2  |
| NCL | 1 | MIR-8521A-3  |
| NCL | 1 | MIR-8521A-4  |
| NCL | 1 | MIR-8521A-5  |
| NCL | 1 | MIR-8521B-1  |
| NCL | 1 | MIR-8521B-10 |
| NCL | 1 | MIR-8521B-11 |
| NCL | 1 | MIR-8521B-2  |
| NCL | 1 | MIR-8521B-3  |
| NCL | 1 | MIR-8521B-4  |
| NCL | 1 | MIR-8521B-5  |
| NCL | 1 | MIR-8521B-6  |
| NCL | 1 | MIR-8521B-7  |
| NCL | 1 | MIR-8521B-8  |
| NCL | 1 | MIR-8521B-9  |
| NCL | 1 | MIR-8558B    |
| NCL | 1 | MIR-858      |
| NCL | 1 | MIR-858B     |
| NCL | 1 | MIR-8624B    |

|     |   |             |
|-----|---|-------------|
| NCL | 1 | MIR-8670A   |
| NCL | 1 | MIR-8789    |
| NCL | 1 | MIR-8823    |
| NCL | 1 | MIR-8905    |
| NCL | 1 | MIR-8908D-3 |
| NCL | 1 | MIR-8979    |
| NCL | 1 | MIR-9052-1  |
| NCL | 1 | MIR-9052-2  |
| NCL | 1 | MIR-9123    |
| NCL | 1 | MIR-9157    |
| NCL | 1 | MIR-9198B-1 |
| NCL | 1 | MIR-9198B-2 |
| NCL | 1 | MIR-9198B-4 |
| NCL | 1 | MIR-9214-1  |
| NCL | 1 | MIR-9214-2  |
| NCL | 1 | MIR-93A-2   |
| NCL | 1 | MIR-9483B   |
| NCL | 1 | MIR-9514    |
| NCL | 1 | MIR-979     |
| NCL | 1 | MIR-9828-1  |
| NCL | 1 | MIR-9828-2  |
| NCL | 1 | MIR-9828-3  |
| NCL | 1 | MIR-9873    |
| NCL | 1 | MIR-9879    |
| NCL | 1 | MIR-993A-2  |
| NCL | 1 | MIR-B20     |
| NCL | 1 | MIR-D8      |
| NCL | 1 | MIR-H7      |
| NCL | 1 | MIR-M59-2   |
| NCL | 1 | MIR-M7      |
| NCL | 1 | MIR-RO6-1   |
| NCL | 1 | MIR-RR1-4   |

---

**Table S2: Predicted NCL regulated miRs**

| <b>gene symbol</b> | <b>OS/PS logFC</b> | <b>P.Value</b> | <b>adj.P.Val</b> | <b>Targeting Factor</b> | <b>Gene_ID</b>  | <b>Identified_sequence</b> |
|--------------------|--------------------|----------------|------------------|-------------------------|-----------------|----------------------------|
| LET-7E             | -0.643713639       | 0.010541       | 0.7365227        | NCL                     | ENSG00000115053 | GguA                       |
| MIR-106B           | 0.435911316        | 0.001722       | 0.3488662        | NCL                     | ENSG00000115053 | AguG                       |
| MIR-107            | 0.287554387        | 0.044707       | 0.9769808        | NCL                     | ENSG00000115053 | AguG                       |
| MIR-133B           | -0.287709587       | 0.021087       | 0.8942505        | NCL                     | ENSG00000115053 | GguC                       |
| MIR-155            | 0.775289378        | 0.034111       | 0.9764284        | NCL                     | ENSG00000115053 | UguU                       |
| MIR-187            | 1.158116187        | 0.001828       | 0.3488662        | NCL                     | ENSG00000115053 | GguC                       |
| MIR-23B            | -0.837009406       | 0.0002         | 0.0869341        | NCL                     | ENSG00000115053 | GguG                       |
| MIR-25             | 0.460191782        | 0.032049       | 0.9682536        | NCL                     | ENSG00000115053 | AguG                       |
| MIR-27B            | -0.675261639       | 0.006756       | 0.6873233        | NCL                     | ENSG00000115053 | GguG                       |
| MIR-30A            | -0.253294968       | 0.006175       | 0.6873233        | NCL                     | ENSG00000115053 | UguA                       |
| MIR-363            | -0.206360979       | 0.048283       | 0.9769808        | NCL                     | ENSG00000115053 | UguU                       |
| MIR-377            | -0.188781741       | 0.018958       | 0.8942505        | NCL                     | ENSG00000115053 | GguU                       |
| MIR-452            | 0.621560242        | 0.018745       | 0.8942505        | NCL                     | ENSG00000115053 | UguU                       |
| MIR-505            | -0.689303148       | 0.027655       | 0.9682536        | NCL                     | ENSG00000115053 | AguG                       |
| MIR-582            | 0.558866512        | 0.024411       | 0.963822         | NCL                     | ENSG00000115053 | UguG                       |
| MIR-877            | 0.398529873        | 0.006766       | 0.6873233        | NCL                     | ENSG00000115053 | guA                        |
| MIR-92A-1          | 0.90399659         | 0.001563       | 0.3488662        | NCL                     | ENSG00000115053 | GguU                       |

**Table S3: Taiwan patient characteristics**

| <b>Characteristic</b> | <b>Healthy control (n=10)</b> | <b>CAD patient (n= 51)</b> |
|-----------------------|-------------------------------|----------------------------|
| Gender (male)         | 8 (80.0%)                     | 38 (74.5%)                 |
| Age (years)           | 47.7 ± 18.4                   | 66.4 ± 12.0                |
| CAD                   | 0                             | 51                         |
| DM                    | 0                             | 22 (43.1%)                 |
| Total cholesterol     | 161.7 ± 17.2                  | 159.5 ± 36.4               |
| HDL                   | 51.3 ± 5.5                    | 40.9 ± 13.0                |
| LDL                   | 106.1 ± 31.67                 | 87.8 ± 27.6                |
| TG                    | 87.7 ± 41.4                   | 145.3 ± 80.9               |

**Table S4: Xi'an patient characteristics**

| <b>Characteristic</b> | <b>Healthy control (n=35)</b> | <b>CAD patient (n= 25)</b> |
|-----------------------|-------------------------------|----------------------------|
| Gender (male)         | 14 (40%)                      | 17 (68%)                   |
| Age (years)           | 40.69 ± 11.69                 | 59.6 ± 8.74                |
| CAD                   | 0                             | 25                         |
| DM (glucose)          | 4.48 ± 0.51                   | 4.66 ± 0.87                |
| Total cholesterol     | 4.33 ± 0.59                   | 3.54 ± 0.74                |
| HDL                   | 1.30 ± 0.26                   | 0.95 ± 0.19                |
| LDL                   | 2.62 ± 0.54                   | 2.04 ± 0.64                |
| TG                    | 1.25 ± 0.75                   | 1.48 ± 0.72                |

**Table S5: miRNA primers**

| <b>Company</b>          | <b>Catalog number</b>     | <b>target</b> | <b>Species</b> |
|-------------------------|---------------------------|---------------|----------------|
| Qiagen                  | MP00003717                | pre-miR-93    | Human          |
| Qiagen                  | MS00003346                | miR-93-5p     | Human          |
| Qiagen                  | MS00010815                | miR-93-3p     | Human          |
| Qiagen                  | MP00002338                | pre-miR-484   | Human          |
| Qiagen                  | MS00004277                | miR-484       | Human          |
| Qiagen                  | MP00006867                | pre-miR-93    | Mouse          |
| Qiagen                  | MS00001449                | miR-93-5p     | Mouse          |
| Qiagen                  | MS00012894                | miR-93-3p     | Mouse          |
| Qiagen                  | MS00002499                | miR-484       | Mouse          |
| Thermofisher scientific | 4441114 Assay ID: AR322R7 | pre-miR-484   | Mouse          |

**Table S6: mRNA primers**

| <b>Target</b> | <b>Direction</b> | <b>Sequence</b>         | <b>Species</b> |
|---------------|------------------|-------------------------|----------------|
| eNOS          | Forward          | GGTACATGAGCACTGAGATCG   | Human          |
| eNOS          | Reverse          | ACGATGGTGACTTTGGCTAG    | Human          |
| KLF2          | Forward          | CAAGACCTACACCAAGAGTTTCG | Human          |
| KLF2          | Reverse          | GTGCCGTTTCATGTGCAG      | Human          |
| eNOS          | Forward          | AAGTCCTCACCGCCTTTTC     | Mouse          |
| eNOS          | Reverse          | TGACACAATCCCTCTTTCCG    | Mouse          |
| KLF2          | Forward          | CCAAGAGCTCGCACCTAAAG    | Mouse          |
| KLF2          | Reverse          | GTGGCACTGAAAGGGTCTGT    | Mouse          |

## **Materials and Methods**

### **AMPK Kinase Assay**

AMPK kinase assays were performed a buffer containing 50 mM HEPES, 0.375 mM AMP, 0.375 mM ATP, 9 mM MgCl<sub>2</sub>, 1 μCi (γ-<sup>32</sup>P)ATP, and 2 mg of target proteins with or without 11 pM AMPK and the reaction was performed at 37 °C for 1 hr. Reaction mixtures were then resolved by SDS-polyacrylamide gel electrophoresis (SDS-PAGE), stained with Coomassie blue, and radioactivity detected with autoradiography. When peptides were analyzed, the reaction conditions were the same as above except that the samples were spotted on Whatman filter paper. Following several washes in 1% phosphoric acid, the level of <sup>32</sup>P was quantified using a Beckman LS 6500 scintillation counter.

### **Isoelectric focusing**

Cells were lysed in a solution containing 5 M urea, 2 M thiourea, 2% CHAPS, 2% SB 3-10, 10 mM DTT, 0.2% (w/v) Bio-Lytes, and 0.001% bromophenol blue. The protein lysates were loaded into Immobilized pH gradient strips (IPG) and isoelectric focusing was conducted at 8,000 V for 35,000 volt-hours in a Protean IEF cell. Samples were then equilibrated in 6 M urea, 2% SDS, 0.375 M Tris-HCL, pH 6.8, 20% glycerol, and 130 mM DTT and then resolved on an SDS-PAGE gel prior to transferring to a PVDF membrane. Immunoblotting was then conducted.

### **Immunofluorescence**

Four percent paraformaldehyde was added to the culture medium to a final concentration of 0.75%. After a 10 min incubation, cells were washed three times with phosphate buffered saline (PBS) (137 mM NaCl, 2.7 mM KCl, 10 mM Na<sub>2</sub>HPO<sub>4</sub>, 2 mM KH<sub>2</sub>PO<sub>4</sub>) and incubated in blocking buffer (3% BSA in PBS) for 1 h. After blocking, cells were incubated in primary antibody diluted in blocking buffer overnight, stained with DAPI, and microphotographs made with a Leica SP5 inverted confocal microscope.



## **Co-Immunoprecipitation**

After washing three times with PBS, cells were lysed in FA lysis buffer (50 mM HEPES-KOH, pH 7.5, 140 mM NaCl, 1 mM EDTA, 1% Triton X-100, 0.1% sodium deoxycholate, 0.1% SDS, Halt protease inhibitors). Cell lysates were incubated in primary antibody bound protein A conjugated sepharose beads overnight. Following several washes with FA lysis buffer, remaining proteins were resolved with SDS-PAGE followed by immunoblotting using standard protocols.

## **qPCR Methods**

RNA was purified using TRIzol reagent from Life Technologies (cat # 10296-028) according to the manufacturer's instructions. Two  $\mu$ g RNA was converted to cDNA using Promega reverse transcriptase according to the manufacturer's instructions (cat # M1701). Messenger RNA was then quantified via qPCR using cyber green qPCR master mix purchased from Bio Rad. Results were calculated using the  $\Delta$ - $\Delta$  ct method. Primers used are listed in SI Appendix, Table S5 and S6.

## **Immunoblotting**

Following transfer, PVDF membranes were blocked for 1 h in blocking buffer (5% milk in TBST (50 mM Tris-HCl, pH 7.4, 150 mM NaCl, 0.1% Tween 20)). Membranes were then washed three times with TBST and incubated with primary antibody diluted in blocking buffer overnight and followed by the secondary antibody. After washing three times in TBST, membranes were incubated with chemiluminescent Horseradish peroxidase (HRP) substrate and immunoblots were developed.

## **RNA Immunoprecipitation**

RNA immunoprecipitations were conducted according to protocols available from Abcam. Following treatment, cells were fixed in 0.75% formaldehyde followed by glycine to a

final concentration of 125 mM. Following fixation, cells were scraped from the surface in RIPA buffer (150 mM KCl, 25 mM Tris pH 7.4, 5 mM EDTA, 0.5 mM DTT, 0.5% NP40, 100 U/ml RNAase inhibitor). Resulting cell lysates were incubated overnight in primary antibody conjugated protein A beads at 4°C. Following incubation beads were washed three times in RIPA buffer and RNA was isolated with TRIzol reagent according to the manufacturer's instructions.

### **NO bioavailability**

NO bioavailability was quantified with the use of the Nitric Oxide colorimetric assay kit (ABcam cat# ab65328) according to the manufacturer's instructions.

### **Transfection**

Transfections were conducted as previously described (33). The following miRNA inhibitors were used from ThermoFisher scientific: Anti-miR-93-5p (Cat# AM10951), Anti-miR-93-3p (Cat# AM12787), Anti-miR-484 (Cat# AM10379). The following siRNAs were used from Qiagen: AMPK $\alpha$ 1 (product# 1027416), AMPK $\alpha$ 2 (product# 1027416), NCL (product# 1027416).

### **Bioinformatics**

All bioinformatics analyses were conducted in R programming language supported by packages installed from the Bioconductor and Comprehensive R Archive Network (CRAN) repositories. miR93 and miR484 overexpression GEO dataset GSE86497 and GSE66844 were used in the analysis. Read alignments to GRCh38 were conducted with Hisat2 read alignment software followed by Fold change and statistical calculations with EdgeR via the systempipeR Bioconductor package.

### **Study Population**

Fifty-two patients with CAD were included in the initial study cohort (discovery cohort). Forty-five healthy controls without CAD or inflammatory diseases were defined as the control group. The

validation cohort includes 32 patients with CAD and 31 controls. The exclusion criteria include a known history of leukopenia, thrombocytopenia, hepatic or renal dysfunction and inflammatory or malignant disease. The research was approved by the institutional ethics committee of Taipei Veterans General Hospital (discovery cohort) and Xi'an Jiaotong University Medical School (validation cohort). The study protocol was carried out in accordance with the Declaration of Helsinki. Written informed consent was obtained from all participants.

### **Statistics**

Data are presented as mean  $\pm$  SEM. Comparisons between 2 groups involved Student t test. Comparisons between 3 or more groups involved one-way ANOVA followed by Bonferroni post-hoc test for equal sample sizes or Turkey-Kramer test for unequal sample sizes.

Correlations were determined by Spearman correlation analysis after determining the non-normal distribution of data. Statistical analyses involved use of SPSS for Windows, v18.0 (SPSS, Inc.; Chicago, IL, USA) and GraphPad Prism v5.01 (GraphPad Software, San Diego, CA, USA). Two-tailed  $p < 0.05$  was considered statistically significant.
